# Supplementary material for: Preparation, characterization and in vitro hypoglycemic activity of banana condensed tannin–inulin conjugate
Source: Royal Society of Chemistry journal article supplement (doi:10.1039/d0fo01652g), 2020-01-01
Supplement: d0fo01652g1.pdf [file d0fo01652g1.pdf]

### Supplementary materials

Article title: **Preparation, characterization and in vitro hypoglycemic activity of banana condensed tannin-inulin conjugate**

Xiangquan Zeng, Zhenjiao Du, Xiaomeng Ding, Yunshu Zhao and Weibo Jiang\*

(College of Food Science and Nutritional Engineering, China Agricultural University, P.O. Box 111, Qinghua Donglu No. 17, Beijing, 100083, PR China)

#### Corresponding Author

Weibo Jiang. Tel.: +86-010-62736565, 62737537, E-mail: [jwb@cau.edu.cn](mailto:jwb@cau.edu.cn)

#### Authors

Xiangquan Zeng, E-mail: [1004585949@qq.com](mailto:1004585949@qq.com)

Zhenjiao Du, E-mail: [dzj@cau.edu.cn](mailto:dzj@cau.edu.cn)

Xiaomeng Ding, E-mail: [aiwo101@163.com](mailto:aiwo101@163.com)

Yunshu Zhao, E-mail: [779103265@qq.com](mailto:779103265@qq.com)

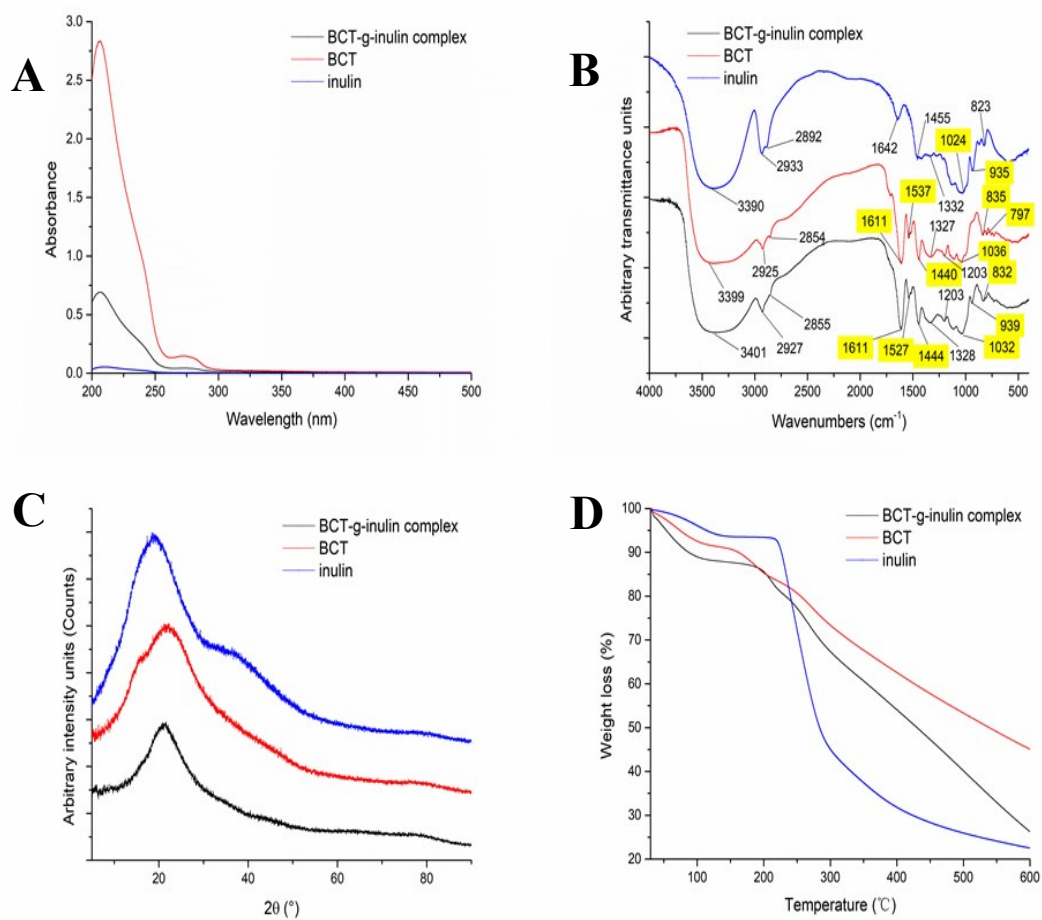

**Fig. S1.** UV-Vis (A), FT-IR (B) spectra, XRD (C) and TGA (D) curves of BCT, inulin and BCT-g-inulin complex.

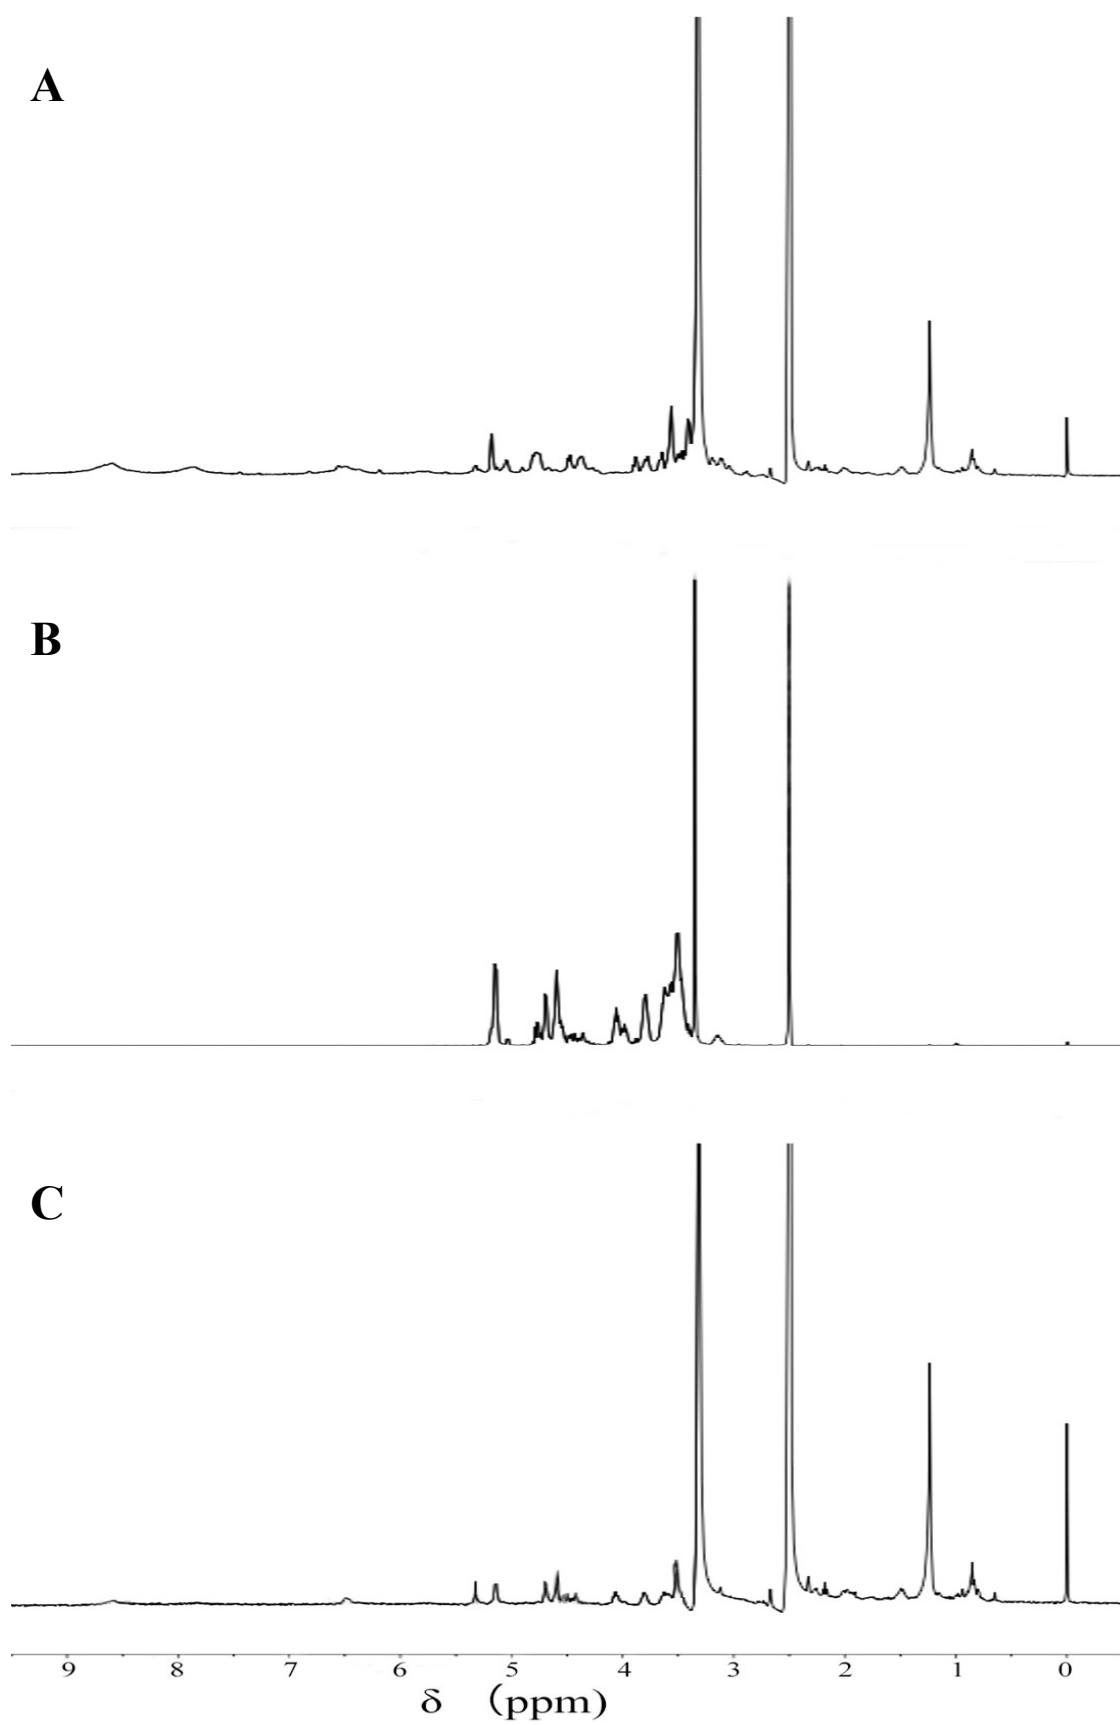

**Fig. S2.**  $^1\text{H}$  NMR spectra of BCT (A), inulin (B) and BCT-g-inulin complex (C).

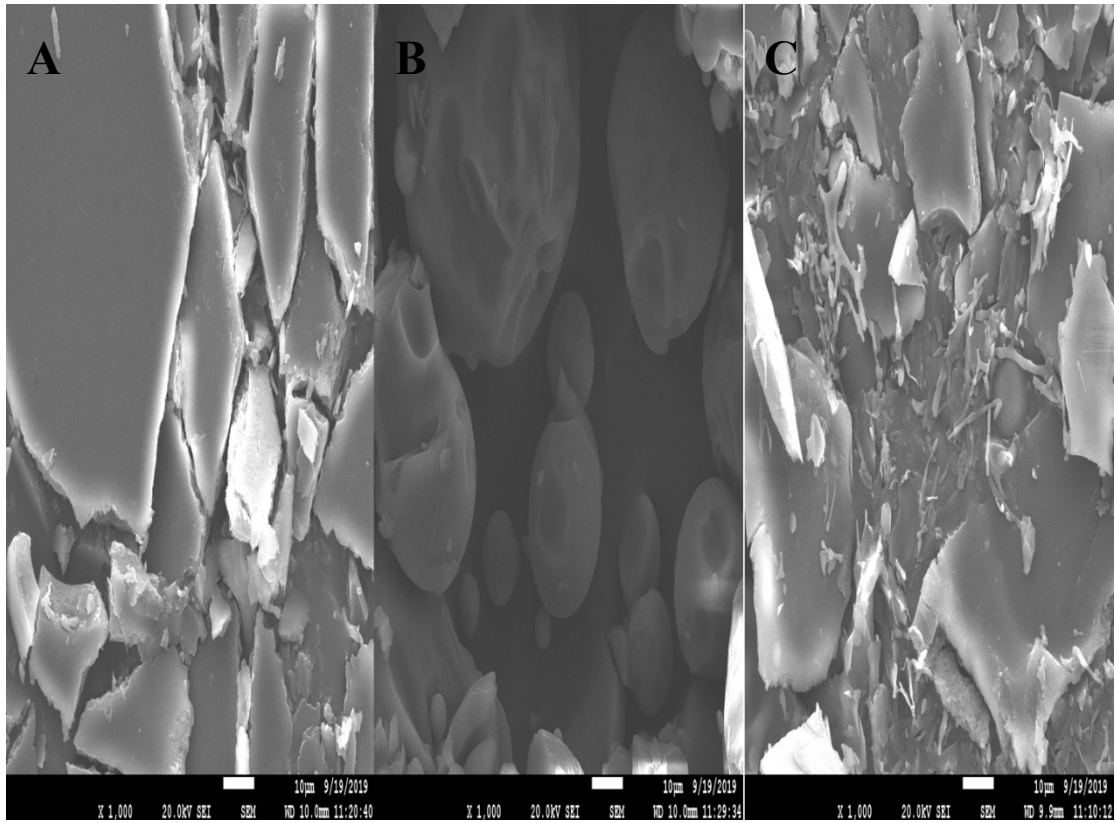

**Fig. S3.** FE-SEM images of BCT(A), inulin (B) and BCT-g-inulin complex (C) (magnification 1000 ×, scanning electron mode).

**Table S1.** Effects of the mass ratio of BCT to inulin on the grafting ratio, grafting efficiency and antioxidant activities of BCT-g-inulin complex.

| Samples                       | Inulin                 | Complex ( I )            | Complex ( II )           | Complex ( III )          |
|-------------------------------|------------------------|--------------------------|--------------------------|--------------------------|
| Grafting ratio (g/kg complex) | -                      | 190.50±2.16 <sup>c</sup> | 226.90±3.11 <sup>b</sup> | 357.54±2.98 <sup>a</sup> |
| Grafting efficiency (%)       | -                      | 52.27±1.32 <sup>c</sup>  | 59.45±0.94 <sup>b</sup>  | 74.57±1.44 <sup>a</sup>  |
| ABTS (mmol TE/g complex)      | 0.04±0.01 <sup>d</sup> | 1.02±0.01 <sup>c</sup>   | 1.21±0.01 <sup>b</sup>   | 1.95±0.01 <sup>a</sup>   |
| DPPH (mmol TE/g complex)      | ND                     | 0.68±0.01 <sup>c</sup>   | 0.83±0.01 <sup>b</sup>   | 1.30±0.01 <sup>a</sup>   |
| CUPRAC (mmol TE/g complex)    | ND                     | 2.09±0.05 <sup>c</sup>   | 2.92±0.03 <sup>b</sup>   | 3.91±0.26 <sup>a</sup>   |
| FRAP (μmol AAE/g complex)     | ND                     | 205.39±4.36 <sup>c</sup> | 224.87±4.82 <sup>b</sup> | 406.88±1.09 <sup>a</sup> |

ND: Not detected; TE: Trolox equivalent; AAE: Ascorbic acid equivalent.

**Table S2.** <sup>1</sup>H NMR signals of BCT, inulin and BCT-g-inulin.

|              | <sup>1</sup> H NMR signals $\delta$ (multiplicity, $J$ = Hz, assignment)                                                                                                                                                                                                                                                                                                                                                                                                                                                                                                                                   |
|--------------|------------------------------------------------------------------------------------------------------------------------------------------------------------------------------------------------------------------------------------------------------------------------------------------------------------------------------------------------------------------------------------------------------------------------------------------------------------------------------------------------------------------------------------------------------------------------------------------------------------|
| BCT          | 8.62 – 8.57 (m, 4H), 7.88 – 7.83 (m, 3H), 6.85 (s, 22H), 6.70 (d, $J$ = 93.3 Hz, 34H), 6.69 (d, $J$ = 104.1 Hz, 54H), 6.36 (dd, $J$ = 264.6, 117.3 Hz, 69H), 7.47 – 5.34 (m, 90H), 5.78 (ddd, $J$ = 137.0, 76.2, 61.6 Hz, 107H), 5.05 (s, 4H), 4.90 (s, 3H), 4.77 (s, 6H), 4.66 (s, 3H), 4.48 (d, $J$ = 8.1 Hz, 6H), 4.39 – 4.34 (m, 5H), 3.93 – 3.84 (m, 6H), 3.78 (d, $J$ = 10.9 Hz, 7H), 3.60 (d, $J$ = 33.8 Hz, 18H), 3.52 – 3.29 (m, 136H), 3.20 (s, 14H), 2.50 (s, 228H), 2.33 (s, 9H), 2.25 (dd, $J$ = 32.6, 19.0 Hz, 19H), 2.31 – 2.20 (m, 6H), 2.47 – 0.92 (m, 96H), 0.83 (d, $J$ = 19.0 Hz, 8H). |
| Inulin       | 5.25 – 5.06 (m, 2H), 4.85 – 4.27 (m, 5H), 4.27 – 3.48 (m, 12H), 3.73 – 3.48 (m, 8H), 3.73 – 3.01 (m, 14H), 2.51 (tt, $J$ = 3.6, 1.8 Hz, 1H).                                                                                                                                                                                                                                                                                                                                                                                                                                                               |
| BCT-g-inulin | 8.56 (m, 1H), 6.50 (s, 2H), 5.35 (s, 8H), 5.60 – 4.21 (m, 69H), 4.59 (s, 7H), 4.59 (s, 24H), 4.56 – 4.28 (m, 12H), 3.32 (s, 373H), 2.57 – 1.95 (m, 417H), 2.18 (dd, $J$ = 254.9, 253.1 Hz, 567H), 1.24 (s, 68H).                                                                                                                                                                                                                                                                                                                                                                                           |

**Table S3.** Molecular weights of BCT, inulin and BCT-g-inulin complex.

|                      | BCT  | Inulin | BCT-g-inulin complex |
|----------------------|------|--------|----------------------|
| $M_n$                | 924  | 4816   | 2058                 |
| $M_w$                | 1066 | 5366   | 2740                 |
| Polydispersity index | 1.15 | 1.11   | 1.33                 |

**Table S4.** Effects of inulin and BCT-g-inulin complex concentrations on the kinetic parameters of  $\alpha$ -amylase.

| Groups                               | $K_m$ (mg/mL) | $V_{max}$ ( $\mu$ M/min) | $K_m/V_{max}$ |
|--------------------------------------|---------------|--------------------------|---------------|
| Inulin (25 $\mu$ g/mL)               | 0.008         | 4.715                    | 0.0018        |
| Inulin (50 $\mu$ g/mL)               | 0.009         | 4.664                    | 0.0019        |
| Inulin (75 $\mu$ g/mL)               | 0.011         | 4.655                    | 0.0023        |
| BCT-g-inulin complex (25 $\mu$ g/mL) | 0.578         | 4.772                    | 0.1212        |
| BCT-g-inulin complex (50 $\mu$ g/mL) | 0.722         | 4.575                    | 0.1579        |
| BCT-g-inulin complex (75 $\mu$ g/mL) | 1.762         | 4.525                    | 0.3895        |

$K_m$ : The Michaelis constant;  $V_{max}$ : Maximum velocity.



**Table S5.** Effects of inulin and BCT-g-inulin complex concentrations on the kinetic parameters of  $\alpha$ -glucosidase.

| Groups                               | $K_m$ (mg/mL) | $V_{max}$ ( $\mu$ M/min) | $K_m/V_{max}$ |
|--------------------------------------|---------------|--------------------------|---------------|
| Inulin (4 $\mu$ g/mL)                | 1.536         | 2.537                    | 0.6056        |
| Inulin (8 $\mu$ g/mL)                | 1.635         | 2.528                    | 0.6469        |
| Inulin (12 $\mu$ g/mL)               | 1.627         | 2.389                    | 0.6807        |
| BCT-g-inulin complex (4 $\mu$ g/mL)  | 0.296         | 0.728                    | 0.4075        |
| BCT-g-inulin complex (8 $\mu$ g/mL)  | 0.904         | 0.749                    | 1.2074        |
| BCT-g-inulin complex (12 $\mu$ g/mL) | 0.996         | 0.668                    | 1.4914        |

**Table S6.** Binding parameters for the interactions of  $\alpha$ -amylase with inulin and BCT-g-inulin complex.

|                                          | $K_{sv}$<br>( $\times 10^{-1}$ mL/ $\mu$ g) | $K_q$<br>[ $\times 10^7$ mL/( $\mu$ g $\cdot$ S)] | $K_a$<br>( $\times 10^{-1}$ L/ $\mu$ g) | n    |
|------------------------------------------|---------------------------------------------|---------------------------------------------------|-----------------------------------------|------|
| $\alpha$ -amylase + inulin               | 0.15                                        | 0.15                                              | 0.46                                    | 0.60 |
| $\alpha$ -amylase + BCT-g-inulin complex | 2.18                                        | 2.18                                              | 0.78                                    | 1.79 |

Note:  $K_{sv}$ : the dynamic quenching constant,  $K_q$ : the quenching rate constant of the biomolecule,  $K_a$ : the binding constant, n: binding sites.

**Table S7.** Binding parameters for the interactions of  $\alpha$ -glucosidase with inulin and BCT-g-inulin complex.

|                                              | $K_{sv}$<br>( $\times 10^{-1}$ mL/ $\mu$ g) | $K_q$<br>[ $\times 10^7$ mL/( $\mu$ g $\cdot$ S)] | $K_a$<br>( $\times 10^{-1}$ L/ $\mu$ g) | n    |
|----------------------------------------------|---------------------------------------------|---------------------------------------------------|-----------------------------------------|------|
| $\alpha$ -glucosidase + inulin               | 0.22                                        | 0.22                                              | 1.00                                    | 0.43 |
| $\alpha$ -glucosidase + BCT-g-inulin complex | 2.25                                        | 2.25                                              | 1.58                                    | 1.13 |
